# Supplementary material
Source: MDPI journal article supplement (https://www.mdpi.com/2079-6412/14/5/631)
Supplement: s1 [file s1]

Supplementary File

# Well-Dispersed CoNiO<sub>2</sub> Nanosheet/CoNi Nanocrystal Arrays Anchored onto Monolayer MXene for Superior Electromagnetic Absorption at Low Frequencies

Leiyu Du <sup>1</sup>, Renxin Xu <sup>1,\*</sup>, Yunfa Si <sup>1</sup>, Wei Zhao <sup>1</sup>, Hongyi Luo <sup>1</sup>, Wei Jin <sup>2</sup> and Dan Liu <sup>3,4,\*</sup>

<sup>1</sup> School of Materials Science and Engineering, Wuhan University of Technology, 122 Luoshi Road, Wuhan 430070, China; duleiyv@whut.edu.cn (L.D.); siyunfa@whut.edu.cn (Y.S.); zw0712@163.com (W.Z.); luohongyi@whut.edu.cn (H.L.)

<sup>2</sup> State Key Laboratory of Silicate Materials for Architectures, Wuhan University of Technology, 122 Luoshi Road, Wuhan 430070, China; jinwei@whut.edu.cn

<sup>3</sup> Department of Chemistry, School of Chemistry, Chemical Engineering and Life Sciences, Wuhan University of Technology, 122 Luoshi Road, Wuhan 430070, China

<sup>4</sup> Foshan Xianhu Laboratory of the Advanced Energy Science and Technology Guangdong Laboratory, Xianhu Hydrogen Valley, 1 Yangming Road, Foshan 528200, China

\* Correspondence: xurenxin@whut.edu.cn (R.X.); danielliu@whut.edu.cn (D.L.)

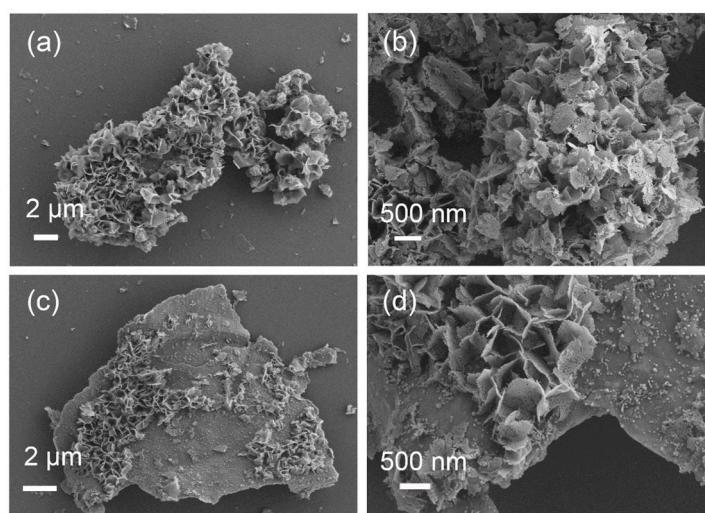

**Figure S1.** SEM images of (a,b) L-MCNO and (c,d) H-MCNO.

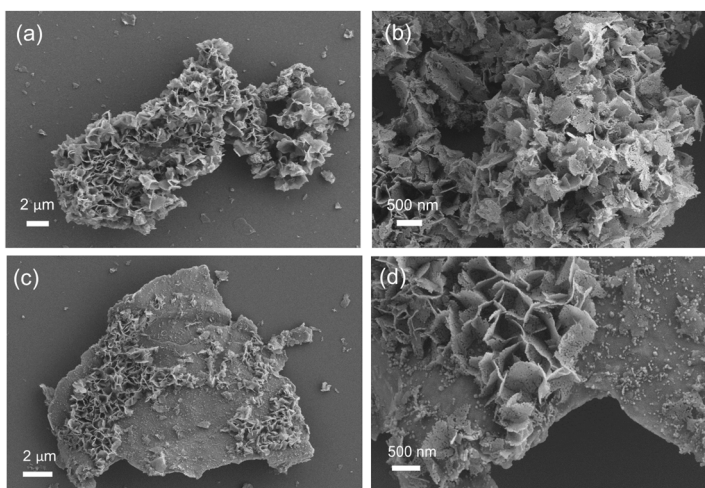

**Figure S2.** SEM image of CoNi hydrate.

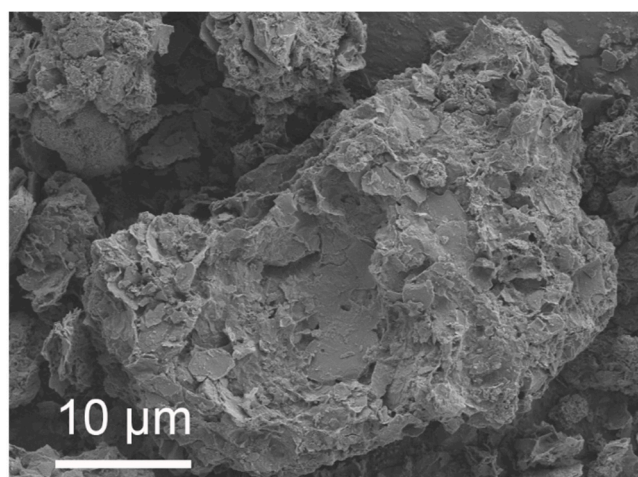

Figure S3. SEM image of M/CNO.

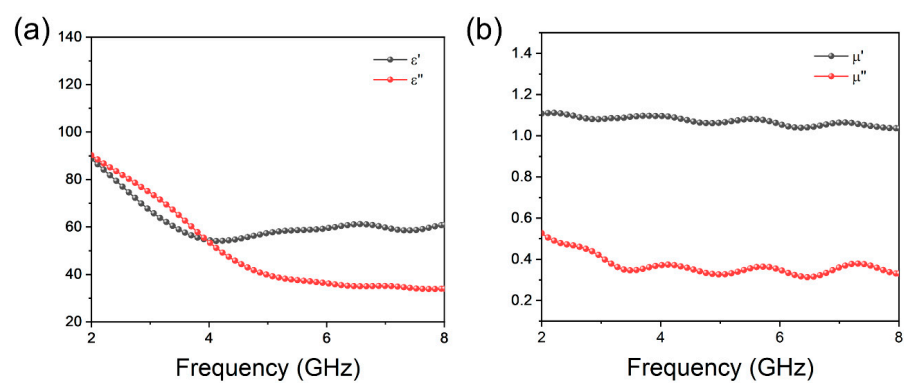

Figure S4. (a)  $\epsilon'$  and  $\epsilon''$ , and (b)  $\mu'$  and  $\mu''$  curves of neat Mxene.

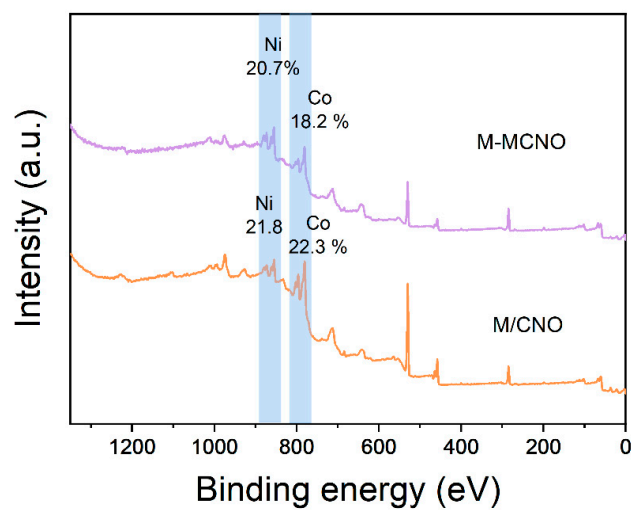

Figure S5. XPS surveys of M-MCNO and M/CNO.

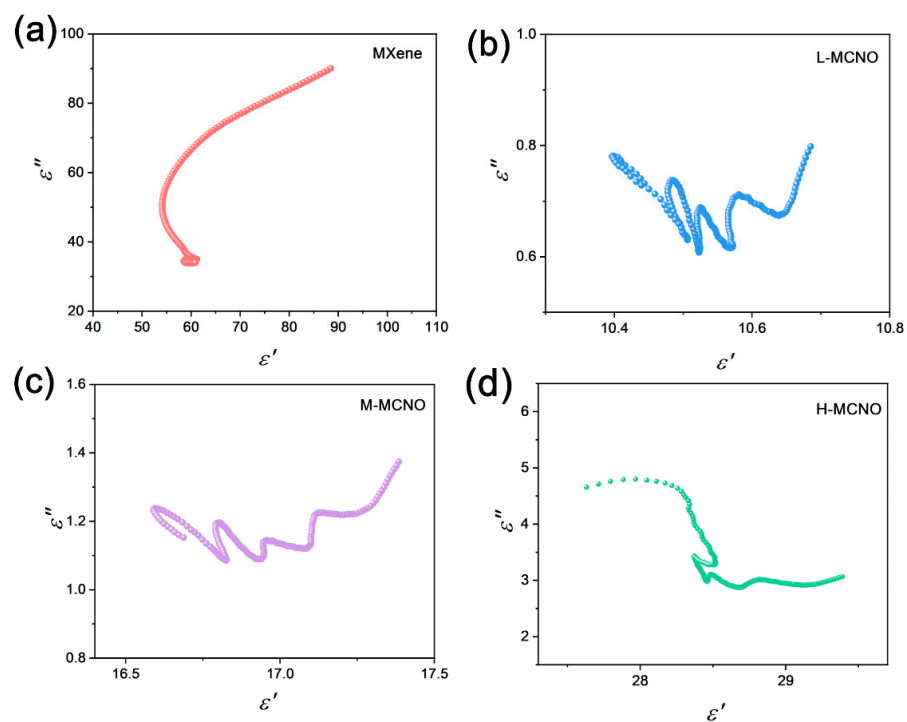

**Figure S6.**  $\epsilon'$ - $\epsilon''$  plots of (a) neat MXene, (b) L-MCNO, (c) M-MCNO, and (d) H-MCNO.

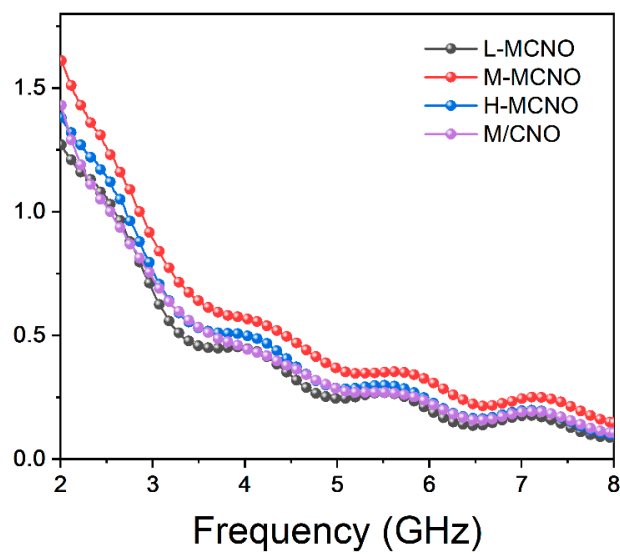

**Figure S7.**  $C_0$  of L-, M-, H-MCNO and M/CNO.

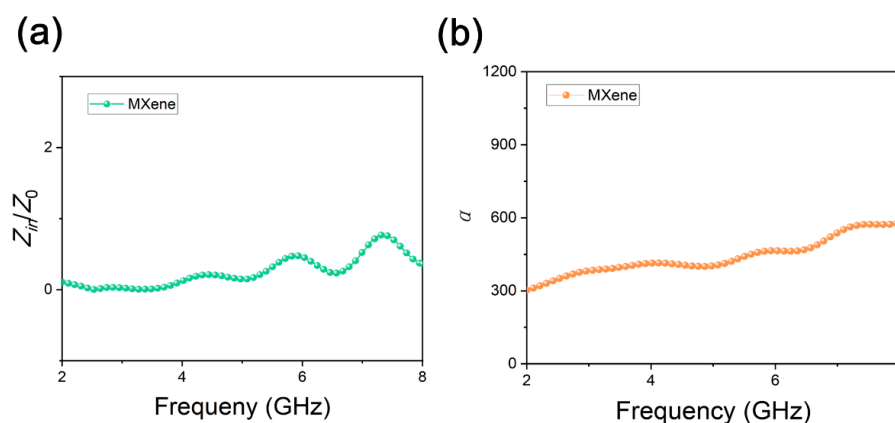

Figure S8. (a)  $Z_{in}/Z_0$  and (b)  $\alpha$  of MXene.

Table S1. Comparison of microwave absorption properties of M-MCNO hybrid with recently reported dielectric-magnetic composites

|   | Absorbers                           | RL <sub>min</sub><br>(dB) | Frequency<br>(GHz) | EAB<br>(GHz) | Ref.      |
|---|-------------------------------------|---------------------------|--------------------|--------------|-----------|
| a | xNi/yNiO/rGO                        | −46.5                     | 3.7                | 0.9          | [1]       |
| b | Fe <sub>3</sub> O <sub>4</sub> /rGO | −33.0                     | 3.9                | 0.8          | [2]       |
| c | CNT@BaTiO <sub>3</sub> @PANI        | −22.3                     | 3.7                | 1.5          | [3]       |
| d | Fe/MXene                            | −40.3                     | 4.9                | 1.4          | [4]       |
| e | Mn-Zn-Fe/C                          | −28.8                     | 3.9                | 0.5          | [5]       |
| f | SiC/FeNi/C                          | −26.2                     | 3.4                | 0.4          | [6]       |
| g | NiAl-LDH/graphene                   | −16.3                     | 5.6                | 0.6          | [7]       |
| h | BaTiO <sub>3</sub> /MWCNTs          | −33.5                     | 6.8                | 0.5          | [8]       |
| i | Co/ZnO/C                            | −21.6                     | 5.5                | 1.8          | [9]       |
| j | Ni <sup>2+</sup> @GO/lignin         | −39.2                     | 4.6                | 1.3          | [10]      |
|   | M-MCNO                              | −45.3                     | 3.24               | 1.48         | This work |

### Supplementary references

- Hou, M.M.; Du, Z.J.; Liu, Y.; Ding, Z.Z.; Huang, X.Z.; Chen, A.L.; Zhang, Q.C.; Ma, Y.T.; Lu, S.J. Reduced graphene oxide loaded with magnetic nanoparticles for tunable low frequency microwave absorption. *J. Alloys Compd.* **2022**, *913*, 165137, doi: 10.1016/j.jallcom.2022.165137.
- Lei, B.Y.; Hou, Y.L.; Meng, W.J.; Wang, Y.Q.; Yang, X.X.; Ren, M.X.; Zhao, D.L. Hierarchical bath lily-like hollow microspheres constructed by graphene and Fe<sub>3</sub>O<sub>4</sub> nanoparticles with enhanced broadband and highly efficient low-frequency microwave absorption. *Carbon* **2022**, *196*, 280–289, doi: 10.1016/j.carbon.2022.04.042.
- Ni, Q.Q.; Zhu, Y.F.; Yu, L.J.; Fu, Y.Q. One-dimensional carbon nanotube@barium titanate@polyaniline multiheterostructures for microwave absorbing application. *Nanoscale Res. Lett.* **2015**, *10*, 174, doi:10.1186/s11671-015-0875-6.
- Liu, J.M.; Yu, W.Z.; Zhao, Z.H.; Liu, D.; Liu, S.S.; Wang, J.; Ma, M.L.; Yu, Q.G.; Yang, N.T. 3D Honeycomb Fe/MXene derived from prussian blue microcubes with a tunable structure for efficient low-frequency and flexible electromagnetic absorbers. *ACS Appl. Mater. Interfaces* **2023**, *15*, 48519–48528, doi:10.1021/acsami.3c09799.
- Bai, Y.H.; Zhang, D.Y.; Lu, Y. Foamed concrete composites: Foamed concrete composites: Mn–Zn ferrite/carbon fiber synergy enhances electromagnetic wave absorption performance. *Ceram. Int.* **2023**, *49*, 33703–33716, doi: 10.1016/j.ceramint.2023.08.058.
- Guo, T.; Huang, B.; Li, C.G.; Lou, Y.M.; Tang, X.Z.; Huang, X.Z.; Yue, J.L. Magnetic sputtering of FeNi/C bilayer film on SiC fibers for effective microwave absorption in the low-frequency region. *Ceram. Int.* **2021**, *47*, 5221–5226, doi: 10.1016/j.ceramint.2020.10.101.
- Yu, G.Y.; Shao, G.F.; Chen, Y.; Huang, X.G. Nanolayered ceramic-confined graphene aerogel with conformal heterointerfaces for low-frequency microwave absorption. *ACS Appl. Mater. Interfaces* **2023**, 39559–39569, doi:10.1021/acsami.3c07988.

8. Song, Y.; Zheng, J.; Liu, X.J.; Sun, M.; Zhao, S. Facile synthesis of BaTiO<sub>3</sub> on multiwalled carbon nanotubes as a synergistic microwave absorber. *J Mater Sci-Mater El* **2016**, *27*, 3390–3396, doi:10.1007/s10854-015-4171-0.
9. Liao, Q.; He, M.; Zhou, Y.M.; Nie, S.X.; Wang, Y.J.; Hu, S.C.; Yang, H.Y.; Li, H.F.; Tong, Y. Highly cuboid-shaped heterobimetallic metal-organic frameworks derived from porous Co/ZnO/C microrods with improved electromagnetic wave absorption capabilities. *ACS Appl. Mater. Interfaces* **2018**, *10*, 29136–29144, doi:10.1021/acsami.8b09093.
10. Du, B.Y.; Chai, L.F.; Li, W.; Wang, X.; Chen, X.H.; Zhou, J.H.; Sun, R.C. Preparation of functionalized magnetic graphene oxide/lignin composite nanoparticles for adsorption of heavy metal ions and reuse as electromagnetic wave absorbers. *Sep. Purif. Technol.* **2022**, *297*, 121509, doi: 10.1016/j.seppur.2022.121509.

**Disclaimer/Publisher's Note:** The statements, opinions and data contained in all publications are solely those of the individual author(s) and contributor(s) and not of MDPI and/or the editor(s). MDPI and/or the editor(s) disclaim responsibility for any injury to people or property resulting from any ideas, methods, instructions or products referred to in the content.
